# Supplementary material
Source: MDPI journal article supplement (https://www.mdpi.com/2673-9976/20/1/34)

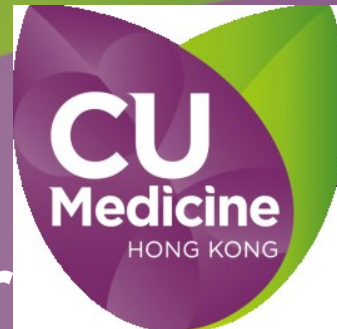

# Graphene: A new material for wound healing

Mary Miu Yee WAYE<sup>1</sup>, Carmen Wing Han CHAN<sup>1</sup>, Ruyuan Ye<sup>2</sup>

<sup>1</sup> The Nethersole School of Nursing, Chinese University of Hong Kong,

<sup>2</sup>Department of Chemistry, The City University of Hong Kong;

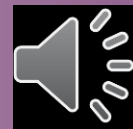

# What is Graphene and some of its derivatives ?

- Graphene could exist as monolayers, multilayers, carbon nanotubes, oxides, reduced oxides, and polystyrene

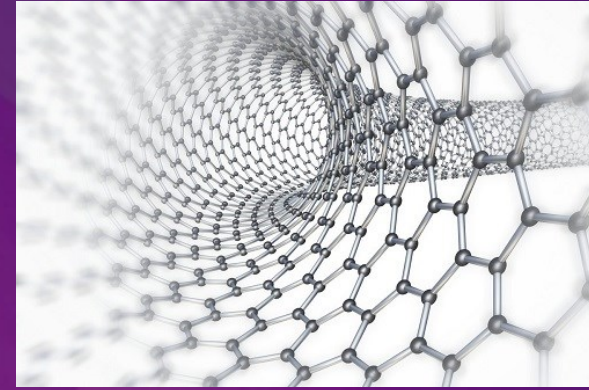

<https://case.ntu.edu.tw/blog/?p=38551>

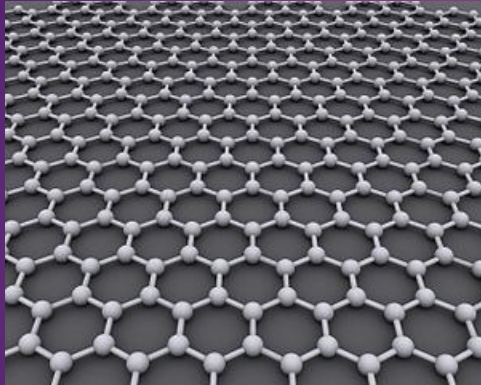

It has amazing properties (incredibly thin but still incredibly strong, good heat and electrical conductivity, almost entirely transparent yet very dense.) and Andre Geim and Sir Kostantin Novoselov won Nobel Prize in 2010 for their groundbreaking experiments regarding the two-dimensional material graphene.

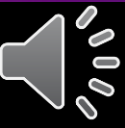

# Potential biological uses of Graphene

- tissue engineering (1,452 results - pubmed)
- skin/muscle/nerve/bone/cartilage repair
- sensors for monitoring diabetic foot and venous leg ulcers (Salvo 2017)
- multifunctional sutures (Houshyar 2021)
- light-triggered antibacterial activity as a form of hybrid hydrogel (Li 2021; Rosselle 2020).

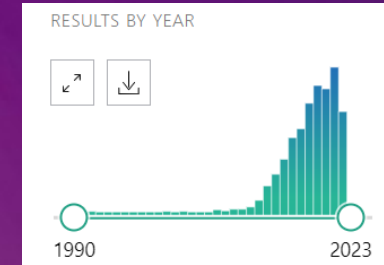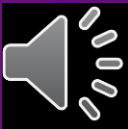

# New dressing materials with graphene

- Wound healing in eczema,
- bed sores or
- burning accidents

These patients have a high risk of bacterial infection, and some graphene materials have shown to provide good therapeutic efficacy in the improvement of wound healing with new dressing materials

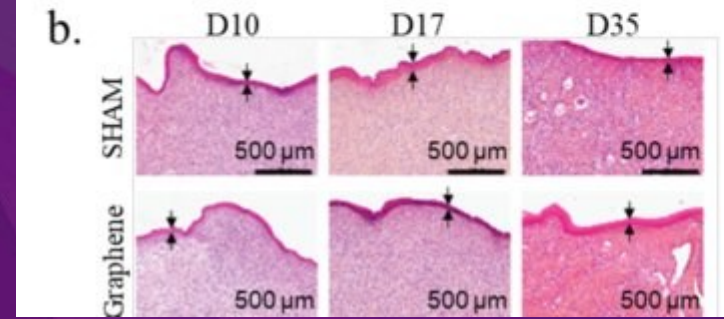

**Monolayer graphene-on-polymer dressings promote healing and stabilize skin temperature on acute and chronic wound models (2021)** Marion Le Gall, Vincent Serantoni, Hervé Louche, Franck Jourdan, Dominique Sigaudou-Roussel, Christelle Bonod, Sandra Ferraro, Riadh Othmen, Antoine Bourrier, Latifa Dahri-Correia, Charlotte Hurot, Luc Téot, Vincent Bouchiat, Alain Lacampagne  
doi: <https://doi.org/10.1101/2021.05.16.444337>



# The mechanism of wound healing (pubmed)

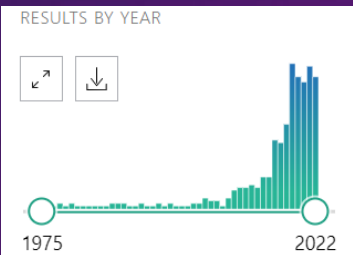

- 2. anti-inflammatory effect

348 results

- 1. anti-bacterial properties,

1,692 results

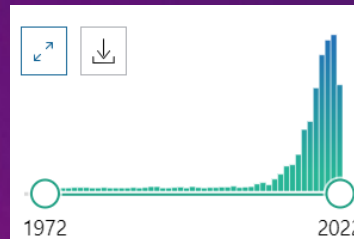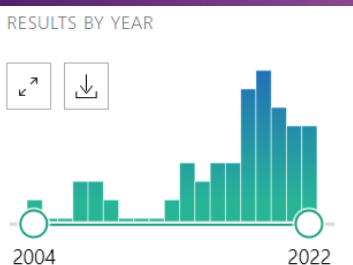

- 3. angiogenic properties.

44 results

23 results

- 4. Immunomodulatory properties

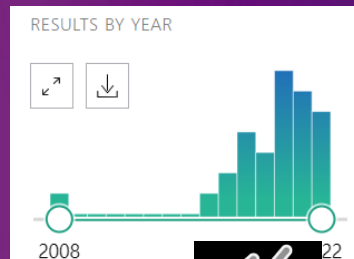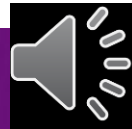

# Graphene's properties which helps with wound healing:

- lack of cytotoxicity,
- compatibility with biological material in terms of adhesiveness,
- lack of inhibition of healthy cell migration.

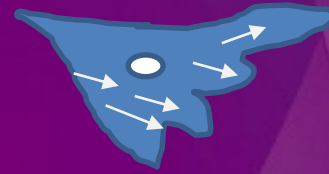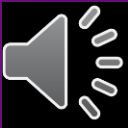



# The Reason for anti-bacterial property

- dehydrating properties or the ability of some functional groups to generate free radicals that kill pathogenic bacteria
- graphene nanosheets induced degradation in the outer and inner membranes of *E. coli* and reduced their viability (Tu 2013) by inserting/cutting through the cell membranes of *E. coli* and vigorously extract large amounts of phospholipids from the membranes.

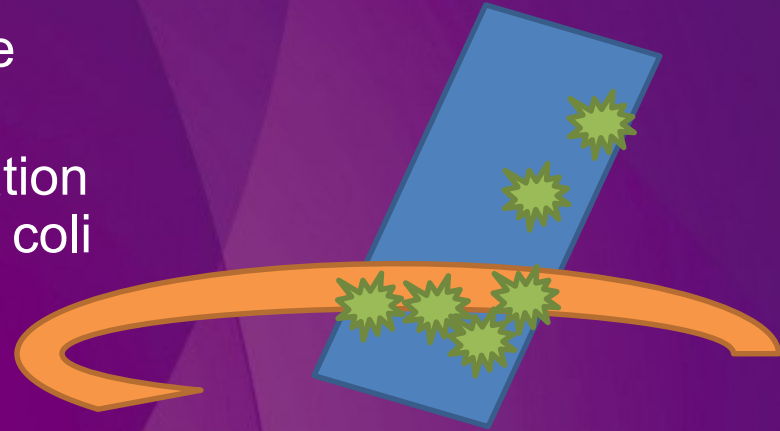

# Demonstration of biocompatibility

- By examination of the adhesion of fibroblasts cell lines and the morphology of their filopodia (or the feet)

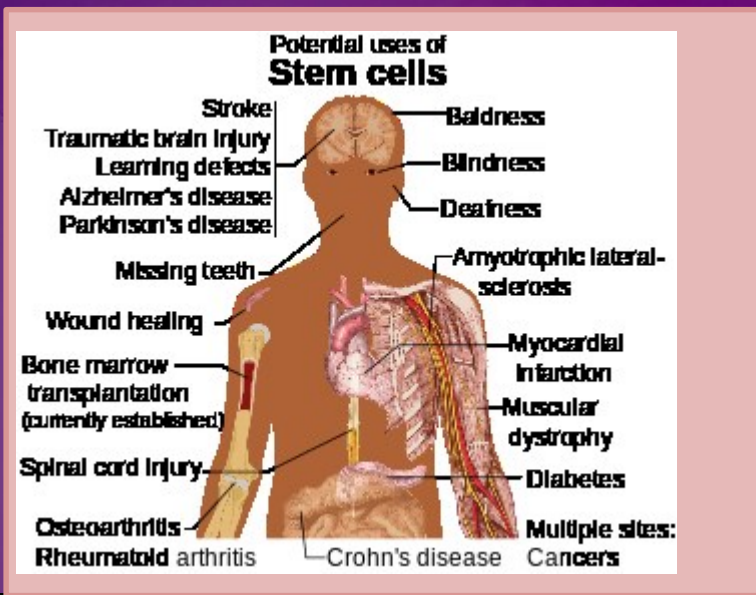

Hydrophobic and aromatic groups on proteins and small molecules can adsorb onto graphene via hydrophobic and  $\pi$ - $\pi$  interactions with the carbon lattice, and in the case of oxidized forms of graphene materials, (GO and rGO) interactions can also occur through hydrogen bonding

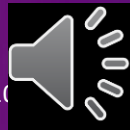



# Stem cell regeneration

- A human stem cell model has also been used to mimic cell regeneration from acute myocardial infarction (MI) using graphene in the form of hydrogels:
- less infarct area and
- more blood vessels

Si et al 2020

[www.sciencedirect.com/science/article/pii/S101113441931629X?via%3Dihub](https://www.sciencedirect.com/science/article/pii/S101113441931629X?via%3Dihub)

Source of photo- [https://en.wikipedia.org/wiki/Myocardial\\_infarction](https://en.wikipedia.org/wiki/Myocardial_infarction)

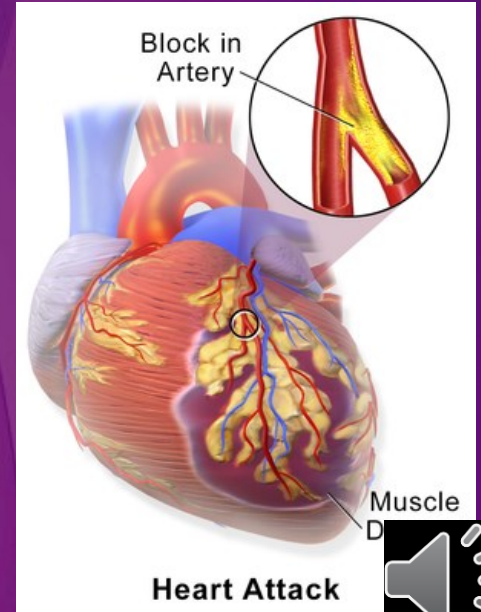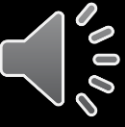

# Evidence for heart regeneration

- enhanced cell survival rate, increased expression of pro-inflammatory factors,
- factors that aid in the formation of new blood vessels, and early cardiogenic biomarkers,
- using graphene quantum dots as a soft injectable hydrogel for heart regenerative function after MI.



# References-1

- Salvo P, Calisi N, Melai B, Dini V, Paoletti C, Lomonaco T, et al. Temperature- and pH-sensitive wearable materials for monitoring foot ulcers. *Int J Nanomedicine*. 2017 Jan 31;12:949–954.
- Houshyar S, Bhattacharyya A, Khalid A, Rifai A, Dekiwadia C, Kumar GS, et al. Multifunctional Sutures with Temperature Sensing and Infection Control. *Macromol Biosci*. 2021 Jan 12;e2000364.
- Li Y, Wang J, Yang Y, Shi J, Zhang H, Yao X, et al. A rose bengal/graphene oxide/PVA hybrid hydrogel with enhanced mechanical properties and light-triggered antibacterial activity for wound treatment. *Mater Sci Eng C Mater Biol Appl*. 2021 Jan;118:111447.
- Rosselle L, Cantelmo AR, Barras A, Skandrani N, Pastore M, Aydin D, et al. An “on-demand” photothermal antibiotic release cryogel patch: evaluation of efficacy on an ex vivo model for skin wound infection. *Biomater Sci*. 2020 Nov 7;8(21):5911–5919

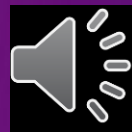

# References-2

- Lee BC, Kim JJ, Lee JY, Kang I, Shin N, Lee SE, Choi SW, Cho JY, Kim HS, Kang KS. Disease-specific primed human adult stem cells effectively ameliorate experimental atopic dermatitis in mice. *Theranostics* 2019; 9(12):3608-3621. doi:10.7150/thno.32945.
- **Monolayer graphene-on-polymer dressings promote healing and stabilize skin temperature on acute and chronic wound models**
- Marion LeGall, Vincent Serantoni, Hervé Louche, Franck Jourdan, Dominique Sigaudou-Roussel, Christelle Bonod, Sandra Ferraro, Riadh Othmen, Antoine Bourrier, Latifa DahriCorreia, Charlotte Hurot, Luc Téot, Vincent Bouchiat, Alain Lacampagne
- <https://doi.org/10.1101/2021.05.16.444337>
- Tu Y., Lv M., Xiu P., Huynh T., Zhang M., Castelli M., Liu Z., Huang Q., Fan C., Fang H. Destructive extraction of phospholipids from Escherichia coli membranes by graphene nanosheets. *Nat. Nanotechnol.* 2013;8:594. doi: 10.1038/nnano.2013.125.
- E.K. Luong-Van, T.T. Madanagopal, V. Rosa, (2020) Mechanisms of graphene influence on cell differentiation, *Materials Today Chemistry*, Volume 16,2020,100250, ISSN 2468-5194, <https://doi.org/10.1016/j.mtchem.2020.100250>.



# Thank you very much for your attention!

- Mary Waye: [Mary-waye@cuhk.edu.hk](mailto:Mary-waye@cuhk.edu.hk)
- Carman Chan: [whchan@cuhk.edu.hk](mailto:whchan@cuhk.edu.hk)
- Ruquan Ye: [ruquanye@cityu.edu.hk](mailto:ruquanye@cityu.edu.hk)

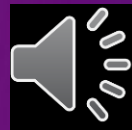

Supplement: s1 [file s1]
